# Supplementary material
Source: PubMed Central journal article supplement (PMC4261955)
Supplement: NIHMS633308-supplement-1.pdf [file NIHMS633308-supplement-1.pdf]

## **Supplementary Material**

# **Proprotein convertase *FURIN* constrains Th2 differentiation and is critical for host resistance against *Toxoplasma gondii***

Anna Oksanen, Saara Aittomäki, Dragana Jankovic, Zsuzsanna Ortutay, Kati Pulkkinen, Sanna Hämäläinen, Anne Rokka, Garry L. Corthals, Wendy T. Watford, Ilkka Junttila, John J. O'Shea, and Marko Pesu

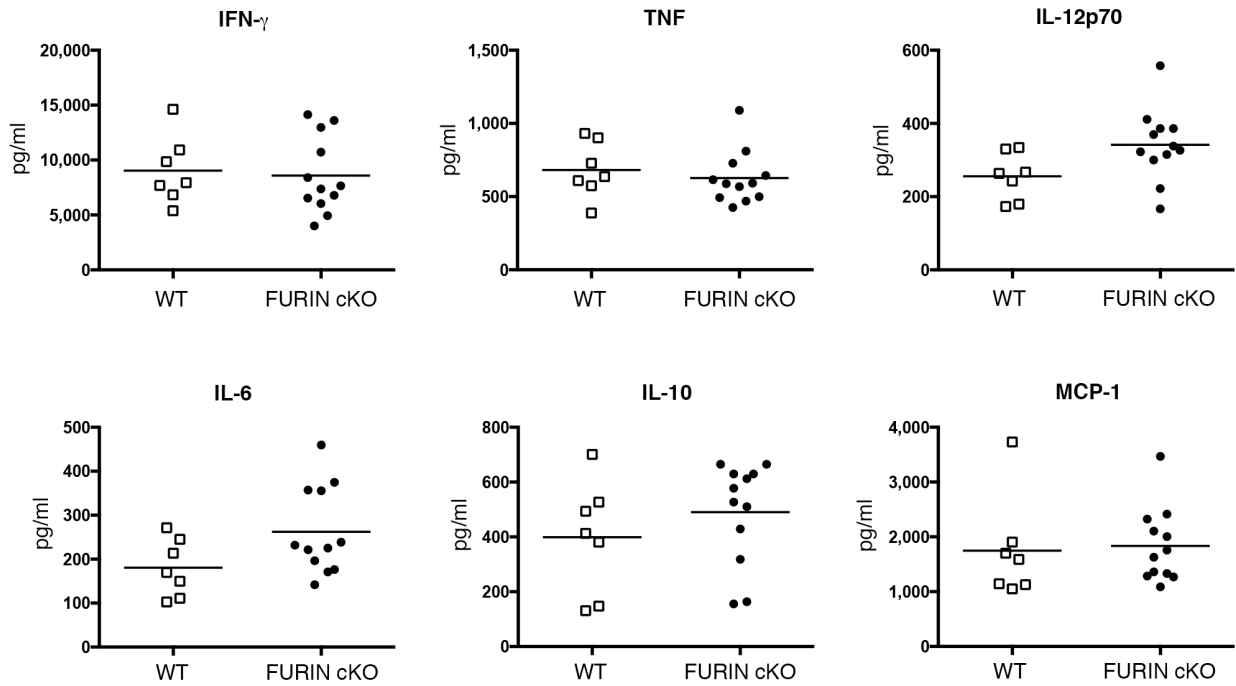

**Figure S1. Serum cytokine levels in *T. gondii* infected CD4cre-fur<sup>f/f</sup> and littermate animals.** CD4cre-fur<sup>f/f</sup> (n=12) and littermate control (n=7) mice were inoculated i.p. with 20 pepsin-treated ME-49 cysts. Serum cytokines were measured 9 days post infection with CBA inflammation kit (BD). Statistically significant differences between the groups could not be detected with Mann-Whitney test. Data is pooled from two identical experiments.

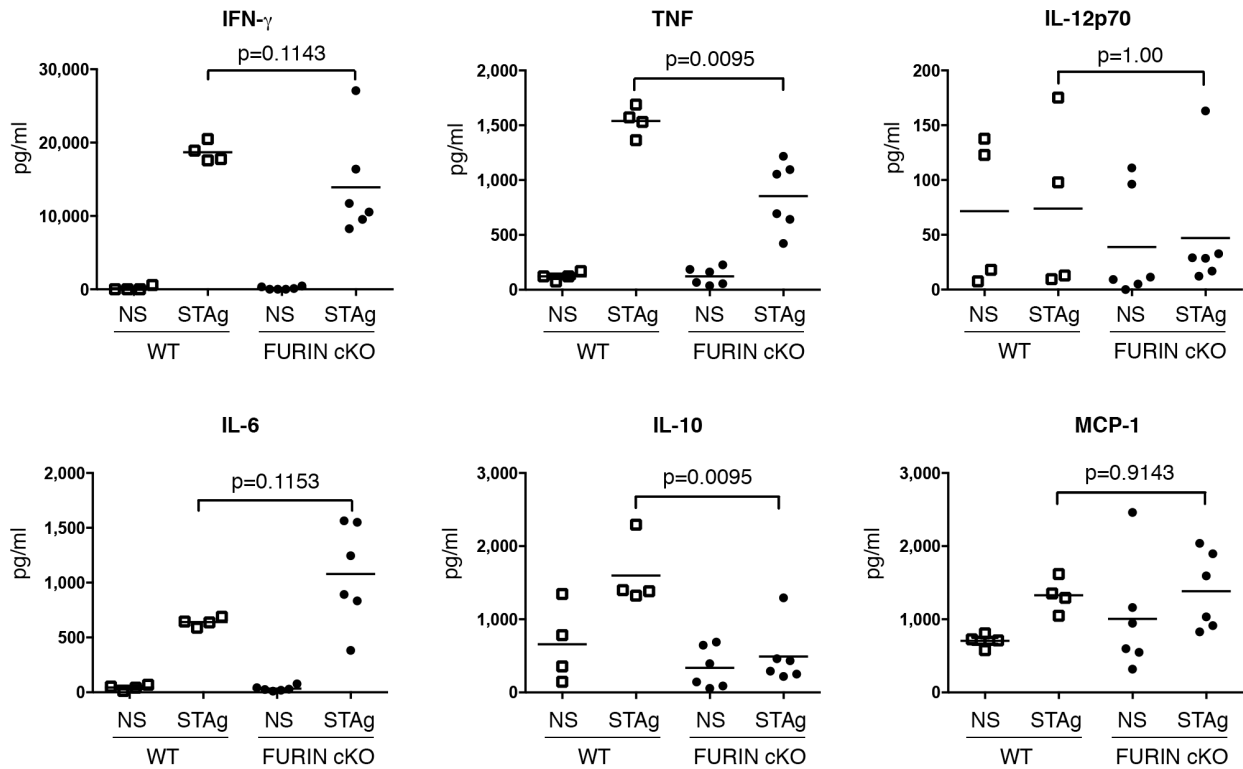

**Figure S2. T-cell-expressed FURIN regulates the production of Th1 type cytokines in response to *T. gondii* antigen stimulation.** Splenocytes from *T. gondii* infected CD4cre-fur<sup>fl/fl</sup> (n=6) and littermate (n=4) mice (38 dpi) were left unstimulated (ns) or stimulated ex vivo with soluble *T. gondii* antigen (STAg, 5  $\mu$ g/ml) for 72 hrs. Cytokine levels were determined from supernatants with CBA kit (BD). Statistics were calculated with Mann-Whitney test.

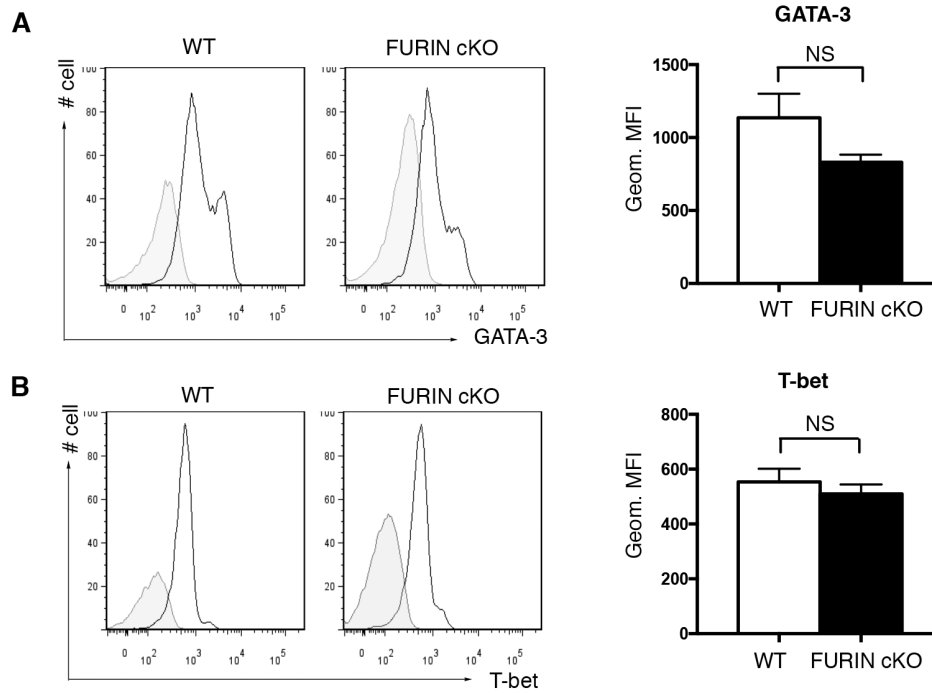

**Figure S3. FURIN does not regulate the expression of GATA-3 or T-bet in thymic CD4+CD8-cells.** Thymocytes from 12 weeks old CD4cre-fur<sup>f/f</sup> (n=4) and littermate (n=3) mice were isolated and stained with CD4, CD8, T-bet and GATA-3 antibodies (eBioscience). Representative histograms (black stained cells, grey unstained cells) and quantification of geometric MFIs are shown for GATA-3 (A) and T-bet (B). No statistical differences (ns) were found using Mann-Whitney test.
